# Supplementary material for: Dietary Intake in the Lifelines Cohort Study: Baseline Results from the Flower Food Frequency Questionnaire among 59,982 Participants
Source: MDPI journal article supplement (doi:10.3390/nu14010048), 2021-12-23
Supplement: s1 [file s1]

**Supplementary table S1.** Classification of 212 food items into 30 food groups.

| Food group                       | Food item                                                                                                                                                                                                                                                                                                                                                                                                                                                                                                                    |
|----------------------------------|------------------------------------------------------------------------------------------------------------------------------------------------------------------------------------------------------------------------------------------------------------------------------------------------------------------------------------------------------------------------------------------------------------------------------------------------------------------------------------------------------------------------------|
| Alcoholic beverages              | Beer<br>Red wine<br>White wine<br>Sherry/port/vermouth/madeira<br>Spirits<br>Other types of alcoholic beverages<br>Non-alcoholic beer*                                                                                                                                                                                                                                                                                                                                                                                       |
| Artificially sweetened beverages | Light soft drinks/lemonade without sugar                                                                                                                                                                                                                                                                                                                                                                                                                                                                                     |
| Bread                            | Rusk/crispbread/crackers<br>Brown bread<br>Brown bread rolls<br>Whole wheat bread<br>Whole wheat bread rolls<br>White bread<br>White bread rolls<br>Raisin/currant/muesli bread<br>Raisin/currant/muesli bread rolls<br>Other types of bread<br>Other types of bread rolls                                                                                                                                                                                                                                                   |
| Breakfast cereals                | Muesli/cruesli/cereals for porridge                                                                                                                                                                                                                                                                                                                                                                                                                                                                                          |
| Cake and cookies                 | Small biscuits<br>Pastry/pie<br>Gingerbread/cookie bars/nutritional biscuits<br>Cake<br>Filled cakes<br>Other types of large cakes                                                                                                                                                                                                                                                                                                                                                                                           |
| Cheese                           | 20+/30+ cheese/cheese spread<br>40+ cheese/cheese spread<br>48+ full-fat cheese/cheese spread<br>Cream cheese/non-Dutch cheese<br>Cheese with a hot meal<br>Cheese in between meals                                                                                                                                                                                                                                                                                                                                          |
| Coffee                           | Coffee<br>Decaffeinated coffee                                                                                                                                                                                                                                                                                                                                                                                                                                                                                               |
| Dairy                            | Ready-to-drink breakfast<br>Full-fat milk<br>Semi-skimmed milk<br>Skim milk<br>Butter milk<br>Chocolate milk<br>Drinking yoghurt/dairy drink with flavor and sugar<br>Other types of dairy drink<br>Full-fat custard<br>Full-fat plain yoghurt<br>Low-fat plain yoghurt<br>Low-fat (fruit) yoghurt<br>Curd cheese/fruit curd<br>Ready-made porridge<br>Ice cream/milk based ice cream<br>Other types of custard/yoghurt/curd<br>Whipped cream<br>Semi-skimmed/low-fat coffee creamer<br>Full-fat coffee creamer/coffee cream |

|                      |                                                       |
|----------------------|-------------------------------------------------------|
|                      | Full-fat/semi-skimmed diet coffee creamer             |
|                      | Coffee creamer                                        |
|                      | Regular milk (in coffee)                              |
|                      | Other types of coffee creamer                         |
| Eggs                 | Boiled egg                                            |
|                      | Fried egg                                             |
| Fat, oils and sauces | Gravy                                                 |
|                      | Mayonnaise                                            |
|                      | Halvanaise/french fries sauce/non-red sauces          |
|                      | Dressing/salad dressing                               |
|                      | Clear dressing without oil                            |
|                      | Mayonnaise (snacks)                                   |
|                      | Halvanaise/french fries sauce/non-red sauces (snacks) |
|                      | Cream with a hot meal                                 |
|                      | Satay sauce with a hot meal                           |
|                      | Other types of hot sauces with a hot meal             |
|                      | Butter (on bread)                                     |
|                      | Semi-skimmed butter (on bread)                        |
|                      | Margarine tub (on bread)                              |
|                      | Margarine packet (on bread)                           |
|                      | Diet margarine (on bread)                             |
|                      | Margarine plant sterols (on bread)                    |
|                      | Low-fat margarine (on bread)                          |
|                      | Diet low-fat margarine (on bread)                     |
|                      | Low-fat margarine plant sterols (on bread)            |
|                      | Other types of spread (on bread)                      |
|                      | Butter (preparation)                                  |
|                      | Margarine tub (preparation)                           |
|                      | Margarine packet (preparation)                        |
|                      | Diet margarine (preparation)                          |
|                      | Margarine plant sterols (preparation)                 |
|                      | Liquid margarine (preparation)                        |
|                      | Low-fat margarine plant sterols (bread)               |
|                      | Solid baking and roasting product (preparation)       |
|                      | Liquid baking and roasting product (preparation)      |
|                      | Olive oil/peanut oil (preparation)                    |
|                      | Sunflower oil/other types of oil (preparation)        |
|                      | Lard/bacon fat                                        |
|                      | Unknown type of baking and roasting product           |
| Fish                 | Salad with fish (on bread)                            |
|                      | Salad with fish (on toast)                            |
|                      | Fish on baguette or toast                             |
|                      | Fish sticks                                           |
|                      | Gourmet/kibbeling                                     |
|                      | Lean fish                                             |
|                      | Fatty fish                                            |
|                      | Herring                                               |
|                      | Trout/tuna                                            |
|                      | Other types of fish                                   |
|                      | Shellfish                                             |
| Fruits               | Apple sauce                                           |
|                      | Citrus fruits                                         |
|                      | Apple/pear/banana                                     |
|                      | Strawberry                                            |
|                      | Kiwi                                                  |
|                      | Other types of fruits                                 |
| Fruit juice          | Apple juice                                           |

|                                                               |                                                                                                                                                                                                                                                                                                                                                                                                                                                                                                                                                                                                                                                                                                                                                             |
|---------------------------------------------------------------|-------------------------------------------------------------------------------------------------------------------------------------------------------------------------------------------------------------------------------------------------------------------------------------------------------------------------------------------------------------------------------------------------------------------------------------------------------------------------------------------------------------------------------------------------------------------------------------------------------------------------------------------------------------------------------------------------------------------------------------------------------------|
|                                                               | Orange juice<br>Fruit drink/double drink/ multi fruit drink<br>Other types of fruit juice or fruit drink                                                                                                                                                                                                                                                                                                                                                                                                                                                                                                                                                                                                                                                    |
| Legumes                                                       | Legumes                                                                                                                                                                                                                                                                                                                                                                                                                                                                                                                                                                                                                                                                                                                                                     |
| Meat                                                          | Boiled liver (on bread)<br>Liver sausage (spread)/pâté/liver pate (on bread)<br>Smoked meat/fricandeau/roast beef (on bread)<br>Bacon/smoked bacon (on bread)<br>Cervelat sausage/sliced sausage/salami (on bread)<br>Luncheon meat/boiled sausage/eel sausage (on bread)<br>Ham (on bread)<br>Other types of meat (on bread)<br>Beef entrecote/beef bratwurst<br>Bacon rashers/bacon bits<br>Pork bratwurst/slavink<br>Pork chop<br>Various types of pork<br>Chicken with skin<br>Chicken without skin<br>Liver<br>Hamburger<br>Minced beef<br>Chopped half and half<br>Smoked sausage/frankfurters<br>Other types of meats<br>Liver sausage (spread)/pâté (in between meals)<br>Boiled liver (in between meals)<br>Other types of meat (in between meals) |
| Nuts and seeds                                                | Peanut butter<br>Peanuts/nuts (with a hot meal)<br>Peanuts/nuts (in between meals)                                                                                                                                                                                                                                                                                                                                                                                                                                                                                                                                                                                                                                                                          |
| Pasta                                                         | White pasta<br>Whole wheat pasta                                                                                                                                                                                                                                                                                                                                                                                                                                                                                                                                                                                                                                                                                                                            |
| Potatoes                                                      | Potatoes with butter/margarine<br>Potatoes without butter/margarine<br>French fries<br>Baked potatoes/rösti<br>Frozen potato slices/potato croquettes<br>Self-fried potatoes, fried in solid frying fat<br>Self-fried potatoes, fried yourself in liquid frying fat<br>Self-fried potatoes, fried in oil                                                                                                                                                                                                                                                                                                                                                                                                                                                    |
| Probiotics and drinks lowering cholesterol and blood pressure | Products with probiotics<br>Drinks lowering cholesterol<br>Drinks lowering blood pressure                                                                                                                                                                                                                                                                                                                                                                                                                                                                                                                                                                                                                                                                   |
| Ready-made products                                           | Chinese/Indian ready meals<br>Fast food meals<br>Other types of ready meals<br>Not prepared yourself (takeaway)                                                                                                                                                                                                                                                                                                                                                                                                                                                                                                                                                                                                                                             |
| Rice                                                          | White rice<br>Whole wheat rice                                                                                                                                                                                                                                                                                                                                                                                                                                                                                                                                                                                                                                                                                                                              |
| Savoury snacks                                                | Pizza<br>Crisps/pretzels<br>Spread without fish (on bread)<br>Spread with fish (on toast)<br>Salad<br>Croquette<br>Other types of hot snacks                                                                                                                                                                                                                                                                                                                                                                                                                                                                                                                                                                                                                |

|                               |                                                                                                                                                                                                                                                                                                                                               |
|-------------------------------|-----------------------------------------------------------------------------------------------------------------------------------------------------------------------------------------------------------------------------------------------------------------------------------------------------------------------------------------------|
| Soft drinks                   | Soft drinks/lemonade with sugar<br>Energy drink                                                                                                                                                                                                                                                                                               |
| Soup                          | Soup with legumes<br>Soup without legumes                                                                                                                                                                                                                                                                                                     |
| Soy products                  | Soy-based meat substitutes<br>Soy milk<br>Soy drink<br>Soy dessert                                                                                                                                                                                                                                                                            |
| Sweets                        | Chocolate spread<br>Other types of sweet spread<br>Sugar/syrup in yoghurt etc<br>Sugar in coffee<br>Sugar/honey om tea<br>Candy bars<br>Candy<br>Dark chocolate<br>Milk chocolate<br>White chocolate                                                                                                                                          |
| Tea                           | Black tea<br>Green tea<br>Tea with licorice extract<br>Herbal tea<br>Other types of tea                                                                                                                                                                                                                                                       |
| Vegan products other than soy | Valess (meat replacer based on dairy)<br>Quorn (meat replacer with mycoprotein)                                                                                                                                                                                                                                                               |
| Vegetables                    | Green beans/string beans<br>Peas<br>Carrots<br>Brussels sprouts<br>Broccoli<br>Cauliflower<br>White/pointed/green/savoy cabbage<br>Spinach<br>Leek<br>Cut vegetable mix<br>Endive<br>Beets<br>Other types of cooked/stir-fried vegetables<br>Mushrooms<br>Tomato<br>Onions<br>Paprika<br>Lettuce<br>Cucumber<br>Other types of raw vegetables |
| Water                         | Water                                                                                                                                                                                                                                                                                                                                         |

\* Non-alcoholic beer also comprises beer low in alcohol and therefore we included non-alcoholic beer in this food group.
